# Supplementary material
Source: PubMed Central journal article supplement (PMC3462342)
Supplement: NIHMS408806-supplement-Supplemental_1.pdf [file NIHMS408806-supplement-Supplemental_1.pdf]

**Supplementary online information S1 (Table).**

This table is a summary of the fMRI and PET studies in drug-addicted individuals vs. healthy control subjects conducted during 2000-2010 (articles published in 2011 have not been methodically reviewed), which were used to create **Figure 2**. Studies are divided by the neuropsychological process and type of drug studied. Number of subjects included, abstinence length, task and analyses, are provided in addition to main results. For our main search, we used PubMed, probing for all articles since 2000 that included the following terms: [(substance OR drug) AND (abus\* OR addict\* OR dependen\*)] AND [(prefrontal OR orbitofrontal OR ventromedial OR anterior cingulate) AND (cortex)] AND [(fMRI OR functional magnetic resonance imaging) OR (PET OR positron emission tomography)] (\*designates search of all possible word endings). This search resulted in 295 manuscripts that were reviewed for inclusion. Excluded from the current review are articles that did not include a control group (unless when not necessary or feasible, such as when studying the effects of acute drug administration, abstinence, treatment, or relapse), studies where methodological concerns precluded deriving definitive conclusions [those without a control task or well defined baseline condition, those that were underpowered (N<10 in each group; also, within the reviewed studies, analyses pertaining to subgroups of N<10 subjects are not reviewed)], and those that lacked explicit group comparisons or had technical difficulties. Other excluded studies are non-English articles, reviews, or studies where focus was not on drug addiction or abuse.

**Functional neuroimaging studies (conducted during 2000-2010) in drug addicted individuals, included in Figure 2**

|                                      | Subjects     | Abstinence                    | Task                      | Coordinates     | PFC results                                                     | Correlations                 |
|--------------------------------------|--------------|-------------------------------|---------------------------|-----------------|-----------------------------------------------------------------|------------------------------|
| <b>ATTENTION</b>                     |              |                               |                           |                 |                                                                 |                              |
| <b>Nicotine</b>                      |              |                               |                           |                 |                                                                 |                              |
| Musso, Bettermann et al. 2007        | 15 S<br>12 C | 1 hour                        | fMRI visual oddball       | AFNI, talairach | S<C T>BL<br>↑ L mPFC 6                                          | Use duration (-)<br>B mPFC 6 |
| <b>Cocaine</b>                       |              |                               |                           |                 |                                                                 |                              |
| Tomasi, Goldstein et al. 2007        | 14 S<br>14 C | 6 S ≤72 hours<br>8 S >30 days | fMRI visual ball-tracking | SPM2, MNI       | S>C T>BL<br>↓ CL rACC 32, ↓ CL ACC 24, ↑ B MidFG 6, ↑ R MidFG 9 |                              |
| <b>WORKING MEMORY</b>                |              |                               |                           |                 |                                                                 |                              |
| <b>Alcohol</b>                       |              |                               |                           |                 |                                                                 |                              |
| Vollstadt-Klein, Hermann et al. 2010 | 11 S<br>12 C | NR                            | fMRI spatial WM           | SPM5, MNI       | S>C T>N<br>↑ L dACC 9                                           |                              |
| <b>Cocaine</b>                       |              |                               |                           |                 |                                                                 |                              |
| Tomasi, Goldstein et al. 2007        | 16 S<br>16 C | 8 S ≤72 hours<br>8 S >4 days  | fMRI verbal n-back        | SPM2, MNI       | S>C T>BL<br>↑ L MidFG 9, ↑ L & CL MidFG 6, ↑                    |                              |

|                                 |                                     |                                   |                                                    |                  |                                                                                            |                                                                                           |
|---------------------------------|-------------------------------------|-----------------------------------|----------------------------------------------------|------------------|--------------------------------------------------------------------------------------------|-------------------------------------------------------------------------------------------|
|                                 |                                     |                                   |                                                    |                  | CL SFG 8, ↓ CL ACC 24                                                                      |                                                                                           |
| <b>Nicotine</b>                 |                                     |                                   |                                                    |                  |                                                                                            |                                                                                           |
| Sutherland, Ross et al. 2010    | 20 S<br>27 C                        | 3 hours                           | fMRI attention switching verbal WM                 | AFNI, talairach  | <b>S&gt;C T&gt;BL</b><br>↑ R mesial FC 8/6, ↑ B ant PFC 10/46                              |                                                                                           |
| <b>DECISION MAKING</b>          |                                     |                                   |                                                    |                  |                                                                                            |                                                                                           |
| <b>Methamphetamine</b>          |                                     |                                   |                                                    |                  |                                                                                            |                                                                                           |
| Paulus, Hozack et al. 2002      | 10 S<br>10 C                        | 22 days                           | fMRI 2-choice prediction                           | AFNI, talairach  | <b>S&lt;C T&gt;N</b><br>↑ R IFG 44, ↑ L MidFG 46, ↑ L MidFG 9/10, ↑ B MedFG 10, ↑ R OFC 11 |                                                                                           |
| Paulus, Hozack et al. 2003      | 14 S<br>14 C                        | 25 days                           | fMRI 2-choice prediction                           | AFNI, talairach  |                                                                                            | <b>Use duration (-)</b><br>L MidFG 9, ACC 32<br><b>Sobriety duration (+)</b><br>L MedFG 8 |
| Paulus, Lovero et al. 2008      | 12 S<br>12 C                        | 48 hours                          | fMRI 2-choice prediction                           | AFNI, talairach  | <b>S&gt;C T&gt;BL</b><br>↑ L MidFG 10 (20 & 50% errors), ↑ R MidFG 10 (20% errors)         |                                                                                           |
| Monterosso, Ainslie et al. 2007 | 10 S<br>13 C                        | 5-7 days                          | fMRI delay discounting                             | FSL, MNI         | <b>S&lt;C T&gt;N</b><br>↑ L DLPFC 9, ↑ R vIPFC/DLPFC 46, ↑ L vIPFC/INS 46, ↑ ACC/SMA 32    |                                                                                           |
| <b>Cocaine</b>                  |                                     |                                   |                                                    |                  |                                                                                            |                                                                                           |
| Bolla, Eldreth et al. 2003      | 13 S<br>13 C                        | ≥25 days                          | H <sub>2</sub> <sup>15</sup> O IGT                 | SPM99, talairach |                                                                                            | <b>Use amount (-)</b><br>L OFC 11                                                         |
| <b>Any dependence</b>           |                                     |                                   |                                                    |                  |                                                                                            |                                                                                           |
| Ersche, Fletcher et al. 2005    | 15 Samp<br>15 Sopi<br>15 ex<br>15 C | S: urine positive<br>ex: 10 years | H <sub>2</sub> <sup>15</sup> O Cambridge Risk Task | SPM2, talairach  | <b>S&lt;C T&gt;N</b><br>↑ R DLPFC 9/46<br><b>S&gt;C T&gt;N</b><br>↑ L OFC 11               |                                                                                           |
| Tanabe, Thompson et al. 2007    | 16 S<br>18 Sg<br>14 C               | ≥2 months                         | fMRI IGT                                           | SPM2, MNI        | <b>S&lt;C T&gt;N</b><br>↑ R mPFC 25/11, ↑ R frontopolar 10                                 |                                                                                           |
| <b>INHIBITORY CONTROL</b>       |                                     |                                   |                                                    |                  |                                                                                            |                                                                                           |
| <b>Methamphetamine</b>          |                                     |                                   |                                                    |                  |                                                                                            |                                                                                           |
| Leland, Arce et al. 2008        | 19 S<br>19 C                        | 34 days                           | fMRI go/no-go                                      | AFNI, talairach  |                                                                                            | <b>False alarm rate (-)</b><br>L vACC 32                                                  |

|                                   |                            |                            |                                       |                   |                                                                                                                           |                                           |
|-----------------------------------|----------------------------|----------------------------|---------------------------------------|-------------------|---------------------------------------------------------------------------------------------------------------------------|-------------------------------------------|
| Salo, Ursu et al. 2009            | 12 S<br>16 C               | 4 months                   | fMRI Stroop                           | SPM5, MNI         | <b>S&lt;C T&gt;N</b><br>↑ R SFG 6                                                                                         |                                           |
| <b>Cocaine</b>                    |                            |                            |                                       |                   |                                                                                                                           |                                           |
| Bolla, Ernst et al. 2004          | 13 S<br>13 C               | ~23 days                   | H <sub>2</sub> <sup>15</sup> O Stroop | SPM99, MNI        |                                                                                                                           | <b>Use amount (-)</b><br>R rACC 24        |
| Li, Huang et al. 2008             | 15 S<br>15 C               | ≥2 weeks                   | fMRI stop signal RT                   | SPM2, MNI         | <b>S&lt;C T&gt;N</b><br>↑ L pgACC 32/24                                                                                   | <b>Stop signal RT (-)</b><br>dmPFC 8      |
| <b>Marijuana</b>                  |                            |                            |                                       |                   |                                                                                                                           |                                           |
| Tapert, Schweinsburg et al. 2007  | 16 S<br>17 C               | 58 days                    | fMRI go/no-go                         | AFNI, talairach   |                                                                                                                           | <b>Use duration (-)</b><br>R DLPFC 10, 46 |
| <b>MDMA</b>                       |                            |                            |                                       |                   |                                                                                                                           |                                           |
| Roberts and Garavan 2010          | 20 S<br>20 C               | 16 days                    | fMRI go/no-go                         | AFNI, talairach   | <b>S&gt;C T&gt;BL</b><br>↑ R MidFG/IFG 46,10, ↑ R MidFG 9,8,6, ↑ L MedFG 10                                               |                                           |
| <b>Alcohol</b>                    |                            |                            |                                       |                   |                                                                                                                           |                                           |
| Heitzeg, Nigg et al. 2010         | 21 S+fh<br>20 C+fh<br>20 C | NR                         | fMRI go/no-go                         | SPM2, MNI (& FSL) | <b>S&gt;C T&gt;N</b><br>↑ B OFC 10, ↑ L mPFC 9, ↑ L dmPFC 8                                                               |                                           |
| <b>Heroin</b>                     |                            |                            |                                       |                   |                                                                                                                           |                                           |
| Yucel, Lubman et al. 2007         | 24 S<br>24 C               | Morning opiate dose        | fMRI interference                     | FSL, talairach    |                                                                                                                           | <b>Errors (+)</b><br>dACC 32 (C not S)    |
| <b>Nicotine</b>                   |                            |                            |                                       |                   |                                                                                                                           |                                           |
| Kozink, Kollins et al. 2010       | 15 S                       | S: as usual<br>A: 24 hours | fMRI go/no-go                         | SPM5, MNI         | <b>A&gt;S T&gt;BL</b><br>↑ R IFC 9                                                                                        |                                           |
| <b>EMOTION</b>                    |                            |                            |                                       |                   |                                                                                                                           |                                           |
| <b>Alcohol</b>                    |                            |                            |                                       |                   |                                                                                                                           |                                           |
| Heitzeg, Nigg et al. 2008         | 11 S<br>11 C               | NR                         | fMRI press for words: P, U, N         | SPM2, MNI         | <b>S&lt;C U/P&gt;N</b><br>↑ R OFC 11<br><b>S&lt;C U&gt;N</b><br>↑ L OFC 11<br><b>S&gt;C P&gt;N</b><br>↑ R dmPFC BA 8/9/10 |                                           |
| <b>MOTIVATION</b>                 |                            |                            |                                       |                   |                                                                                                                           |                                           |
| <b>Cocaine</b>                    |                            |                            |                                       |                   |                                                                                                                           |                                           |
| Goldstein, Alia-Klein et al. 2007 | 16 S<br>13 C               | 5 days                     | fMRI money for go/no-go               | SPM99, MNI        | <b>S&lt;C T&gt;N</b><br>↑ L OFC 47, 13                                                                                    |                                           |

|                                     |              |                       |                                                                  |                 |                                                                                                                                              |                                                                                                |
|-------------------------------------|--------------|-----------------------|------------------------------------------------------------------|-----------------|----------------------------------------------------------------------------------------------------------------------------------------------|------------------------------------------------------------------------------------------------|
| Goldstein, Alia-Klein et al. 2009   | 17 S<br>17 C | 5 days                | fMRI money for drug Stroop                                       | SPM2, MNI       | <b>S&lt;C T&gt;BL</b><br>↑ R dACC 32<br><b>S&gt;C T&lt;BL</b><br>↓ L rvACC/mOFC 10,11<br><b>S&gt;C T&gt;BL</b><br>↑ L DLPFC 6,8, ↑ L dmPFC 6 | <b>Current use frequency (-)</b><br>L dACC 24<br><b>Task-induced craving (+)</b><br>L rvACC 10 |
| <b>Nicotine</b>                     |              |                       |                                                                  |                 |                                                                                                                                              |                                                                                                |
| Buhler, Vollstadt-Klein et al. 2010 | 21 S<br>21 C | 36 hours vs. as usual | fMRI instrumental motivation                                     | SPM5, MNI       | <b>S&lt;C Money&gt;Cigarette</b><br>↑ L ACC 24,32, ↑ R SFG 9,10                                                                              |                                                                                                |
| <b>CUES</b>                         |              |                       |                                                                  |                 |                                                                                                                                              |                                                                                                |
| Miyake, Okamoto et al. 2010         | 36 S<br>12 C | NR                    | fMRI select most negative or neutral words:<br>Bd, N, U          | SPM5, MNI       | <b>S&gt;C Bd&gt;N</b><br>↑ L vmPFC 9                                                                                                         |                                                                                                |
| Reuter, Raedler et al. 2005         | 12 S<br>12 C | NR                    | fMRI guessing task<br>W, L                                       | SPM2, MNI       |                                                                                                                                              | <b>Gambling severity (-)</b><br>L vmPFC 32                                                     |
| Filbey, Claus et al. 2008           | 37 S         | 24 hours              | fMRI preferred taste<br>D, N                                     | FSL, talairach  |                                                                                                                                              | <b>Alcohol use severity (+)</b><br>B OFC 11, 47, vmPFC 24, 10                                  |
| McClernon, Kozink et al. 2009       | 18 S         | 24 hours vs. as usual | fMRI passive picture viewing<br>D, N                             | SPM5, MNI       |                                                                                                                                              | <b>Nicotine craving (+)</b><br>R SFG 6,10, R ACC 32                                            |
| Zhang, Salmeron et al. 2011         | 22 S<br>22 C | ≥2 hours              | ASL passive picture viewing :<br>D, N                            | AFNI, talairach | <b>S&gt;C D&gt;N</b><br>↑ B dmPFC, ↑ R DLPFC, ↑ B dACC,<br>↑ B rACC                                                                          | <b>Lifetime drug use (+)</b><br>rACC<br><b>Lifetime drug use (-)</b><br>DLPFC                  |
| <b>MECHANISMS</b>                   |              |                       |                                                                  |                 |                                                                                                                                              |                                                                                                |
| <b>Dopamine/Norepinephrine</b>      |              |                       |                                                                  |                 |                                                                                                                                              |                                                                                                |
| Volkow, Wang et al. 2005            | 21 S<br>15 C | 14 days               | FDG + Raclopride<br>PL, iv MPH                                   | SPM99, MNI      | <b>S&lt;C PL&gt;MPH</b><br>↑ R mOFC 25,11                                                                                                    |                                                                                                |
| Goldstein, Woicek et al. 2011       | 13 S<br>14 C | 6 days                | fMRI (emotional Stroop) 2 days<br>PL or MPH (oral 20 mg)<br>D, N | SPM2, MNI       | <b>Dr&gt;PL T&gt;BL</b> (driven by S)<br>↑ rvACC 32, ↑ L dACC 24                                                                             | <b>Accuracy (+)</b><br>B mOFC/MedFG 10,32,<br>R dACC 24<br><b>Drug use (-)</b><br>M dACC 32    |
| Li, Morgan et al. 2010              | 10 S         | 8 days                | fMRI SSRT                                                        | SPM8, MNI       |                                                                                                                                              | <b>SSRT (+)</b>                                                                                |

|                             |                 |                                            |                                                                                                        |           |                                        |                                                                                                                     |
|-----------------------------|-----------------|--------------------------------------------|--------------------------------------------------------------------------------------------------------|-----------|----------------------------------------|---------------------------------------------------------------------------------------------------------------------|
|                             | 36 C            |                                            | PL, iv MPH                                                                                             |           |                                        | L MidFG 8<br><b>SSRT (-)</b><br>L vmPFC 25                                                                          |
| <b>Opioid</b>               |                 |                                            |                                                                                                        |           |                                        |                                                                                                                     |
| Gorelick, Kim et al. 2005   | 17 S<br>16 C    | 1. ~24 hours<br>2. ~1 week<br>3. ~12 weeks | Carfentanil ( $\mu$ )                                                                                  | SPM2, MNI |                                        | <b>Craving (+)</b><br>1. L ACC 24, L FC 9<br>2. L FC 10<br><b>Use frequency (+)</b><br>1. R ACC 32, R FC 9          |
| Ghitza, Preston et al. 2010 | Cocaine<br>25 S | NR<br>(17 urine positive)                  | Carfentanil ( $\mu$ )                                                                                  | SPM2, MNI |                                        | <b>Drug use (+)</b><br>R MidFG 8, L MedFG 10<br><b>Abstinence (-)</b><br>L medFG 6, L MidFG 9, L ACC 24, R MidFG 46 |
| <b>Cholinergic</b>          |                 |                                            |                                                                                                        |           |                                        |                                                                                                                     |
| Adinoff, Devous et al. 2010 | 23 S<br>22 C    | 27 days                                    | SPECT 3 days<br>Saline,<br>physostigmine (iv<br>>0.816 mg/h), or<br>scopolamine (iv<br>0.315 mg/70 kg) | SPM2, MNI | <b>S&lt;C Dr&gt;PL</b><br>↓ R DLPFC 10 |                                                                                                                     |

C controls, S subjects, Sg gamblers, Samp amphetamine users, Sopi opiate users, ex past users, +fh with family history of alcohol use disorders  
 fMRI functional magnetic resonance imaging, FDG positron emission tomography (PET) with [<sup>18</sup>F]fluorodeoxyglucose for glucose metabolism, H<sub>2</sub><sup>15</sup>O PET for blood flow, SPECT single photon emission-computed tomography for cerebral blood flow, WM working memory, IGT Iowa gambling task, RT reaction time, PL placebo, MPH methylphenidate, iv intravenous administration, DV distribution volume, SERT serotonin transporter  
 MNI Montreal Neurological Institute, SPM Statistical Parametric Mapping, FSL FMRIB (fMRI of the Brain) Software Library, AFNI Analysis of Functional Neuroimages software package  
 D drug (within respective category), Dr Drug, T Task, N neutral, P pleasant, U unpleasant, W win, L loss, BL baseline  
 ACC anterior cingulate cortex, dACC dorsal ACC, ifgACC infragenual ACC, pgACC perigenual ACC, rACC rostral ACC, scACC subcallosal ACC, vACC ventral ACC, FC frontal cortex, aFC anterior FC, mFC middle FC, IFC inferior FC, PFC prefrontal cortex, mPFC medial PFC, dmPFC dorsomedial PFC, vmPFC ventromedial PFC, DLPFC dorsolateral PFC, vIPFC ventrolateral PFC, IFG inferior frontal gyrus, OFC orbitofrontal cortex, mOFC medial OFC, MedFG medial frontal gyrus, MidFG middle frontal gyrus, SFG superior frontal gyrus, INS insula, SMA supplementary motor area  
 (+) positive correlation, (-) negative correlation  
 R right, L left, B bilateral, CL central  
 If available: ↑ increase/activation/hyperactivation, ↓ decrease/deactivation/hypoactivation

Subject column is in italics if groups are matched on 2 of the following: age, sex, race, education

Where not provided, xyz coordinates were converted to the Talairach space for Brodmann area identification (regions where nearest grey matter did not include a PFC Brodmann Area were excluded)

**References**

- Adinoff, B., M. D. Devous, Sr., M. J. Williams, S. E. Best, T. S. Harris, A. Minhajuddin, T. Zielinski and M. Cullum (2010). "Altered Neural Cholinergic Receptor Systems in Cocaine-Addicted Subjects." *Neuropsychopharmacology* **35**(7): 1485-99.
- Bolla, K., M. Ernst, K. Kiehl, M. Mouratidis, D. Eldreth, C. Contoreggi, J. Matochik, V. Kurian, J. Cadet, A. Kimes, F. Funderburk and E. London (2004). "Prefrontal cortical dysfunction in abstinent cocaine abusers." *J Neuropsychiatry Clin Neurosci* **16**(4): 456-64.
- Bolla, K. I., D. A. Eldreth, E. D. London, K. A. Kiehl, M. Mouratidis, C. Contoreggi, J. A. Matochik, V. Kurian, J. L. Cadet, A. S. Kimes, F. R. Funderburk and M. Ernst (2003). "Orbitofrontal cortex dysfunction in abstinent cocaine abusers performing a decision-making task." *Neuroimage* **19**(3): 1085-94.
- Buhler, M., S. Vollstadt-Klein, A. Kobiella, H. Budde, L. J. Reed, D. F. Braus, C. Buchel and M. N. Smolka (2010). "Nicotine dependence is characterized by disordered reward processing in a network driving motivation." *Biol Psychiatry* **67**(8): 745-52.
- Ersche, K. D., P. C. Fletcher, S. J. Lewis, L. Clark, G. Stocks-Gee, M. London, J. B. Deakin, T. W. Robbins and B. J. Sahakian (2005). "Abnormal frontal activations related to decision-making in current and former amphetamine and opiate dependent individuals." *Psychopharmacology (Berl)* **180**(4): 612-23.
- Filbey, F. M., E. Claus, A. R. Audette, M. Niculescu, M. T. Banich, J. Tanabe, Y. P. Du and K. E. Hutchison (2008). "Exposure to the taste of alcohol elicits activation of the mesocorticolimbic neurocircuitry." *Neuropsychopharmacology* **33**(6): 1391-401.
- Ghitza, U. E., K. L. Preston, D. H. Epstein, H. Kuwabara, C. J. Endres, B. Bencherif, S. J. Boyd, M. L. Copersino, J. J. Frost and D. A. Gorelick (2010). "Brain mu-opioid receptor binding predicts treatment outcome in cocaine-abusing outpatients." *Biol Psychiatry* **68**(8): 697-703.
- Goldstein, R. Z., N. Alia-Klein, D. Tomasi, J. H. Carrillo, T. Maloney, P. A. Woicik, R. Wang, F. Telang and N. D. Volkow (2009). "Anterior cingulate cortex hypoactivations to an emotionally salient task in cocaine addiction." *Proc Natl Acad Sci U S A* **106**(23): 9453-8.
- Goldstein, R. Z., P. A. Woicik, T. Maloney, D. Tomasi, N. Alia-Klein, J. Shan, J. Honorio Carrillo, D. Samaras, R. Wang, F. Telang, G.-J. Wang and N. D. Volkow (2010). "Oral methylphenidate normalizes cingulate activity in cocaine addiction during a salient cognitive task." *Proc Natl Acad Sci U S A* **107**(38): 16667-72.
- Gorelick, D. A., Y. K. Kim, B. Bencherif, S. J. Boyd, R. Nelson, M. Copersino, C. J. Endres, R. F. Dannals and J. J. Frost (2005). "Imaging brain mu-opioid receptors in abstinent cocaine users: time course and relation to cocaine craving." *Biol Psychiatry* **57**(12): 1573-82.
- Heitzeg, M. M., J. T. Nigg, W. Y. Yau, J. K. Zubieta and R. A. Zucker (2008). "Affective circuitry and risk for alcoholism in late adolescence: differences in frontostriatal responses between vulnerable and resilient children of alcoholic parents." *Alcohol Clin Exp Res* **32**(3): 414-26.
- Heitzeg, M. M., J. T. Nigg, W. Y. Yau, R. A. Zucker and J. K. Zubieta (2010). "Striatal Dysfunction Marks Preexisting Risk and Medial Prefrontal Dysfunction Is Related to Problem Drinking in Children of Alcoholics." *Biol Psychiatry* **68**(3): 287-295.

- Kozink, R. V., S. H. Kollins and F. J. McClernon (2010). "Smoking Withdrawal Modulates Right Inferior Frontal Cortex but not Presupplementary Motor Area Activation During Inhibitory Control." *Neuropsychopharmacology* **35**(13): 2600-6.
- Leland, D. S., E. Arce, D. A. Miller and M. P. Paulus (2008). "Anterior cingulate cortex and benefit of predictive cueing on response inhibition in stimulant dependent individuals." *Biol Psychiatry* **63**(2): 184-90.
- Li, C. S., C. Huang, P. Yan, Z. Bhagwagar, V. Milivojevic and R. Sinha (2008). "Neural correlates of impulse control during stop signal inhibition in cocaine-dependent men." *Neuropsychopharmacology* **33**(8): 1798-806.
- Li, C. S., P. T. Morgan, D. Matuskey, O. Abdelghany, X. Luo, J. L. Chang, B. J. Rounsaville, Y. S. Ding and R. T. Malison (2010). "Biological markers of the effects of intravenous methylphenidate on improving inhibitory control in cocaine-dependent patients." *Proc Natl Acad Sci U S A* **107**(32): 14455-9.
- McClernon, F. J., R. V. Kozink, A. M. Lutz and J. E. Rose (2009). "24-h smoking abstinence potentiates fMRI-BOLD activation to smoking cues in cerebral cortex and dorsal striatum." *Psychopharmacology (Berl)* **204**(1): 25-35.
- Miyake, Y., Y. Okamoto, K. Onoda, N. Shirao, Y. Otagaki and S. Yamawaki (2010). "Neural processing of negative word stimuli concerning body image in patients with eating disorders: an fMRI study." *Neuroimage* **50**(3): 1333-9.
- Monterosso, J. R., G. Ainslie, J. Xu, X. Cordova, C. P. Domier and E. D. London (2007). "Frontoparietal cortical activity of methamphetamine-dependent and comparison subjects performing a delay discounting task." *Hum Brain Mapp* **28**(5): 383-93.
- Musso, F., F. Bettermann, G. Vucurevic, P. Stoeter, A. Konrad and G. Winterer (2007). "Smoking impacts on prefrontal attentional network function in young adult brains." *Psychopharmacology (Berl)* **191**(1): 159-69.
- Paulus, M. P., N. Hozack, L. Frank, G. G. Brown and M. A. Schuckit (2003). "Decision making by methamphetamine-dependent subjects is associated with error-rate-independent decrease in prefrontal and parietal activation." *Biol Psychiatry* **53**(1): 65-74.
- Paulus, M. P., N. E. Hozack, B. E. Zauscher, L. Frank, G. G. Brown, D. L. Braff and M. A. Schuckit (2002). "Behavioral and functional neuroimaging evidence for prefrontal dysfunction in methamphetamine-dependent subjects." *Neuropsychopharmacology* **26**(1): 53-63.
- Paulus, M. P., K. L. Lovero, M. Wittmann and D. S. Leland (2008). "Reduced behavioral and neural activation in stimulant users to different error rates during decision making." *Biol Psychiatry* **63**(11): 1054-60.
- Reuter, J., T. Raedler, M. Rose, I. Hand, J. Glascher and C. Buchel (2005). "Pathological gambling is linked to reduced activation of the mesolimbic reward system." *Nat Neurosci* **8**(2): 147-8.
- Roberts, G. M. and H. Garavan (2010). "Evidence of increased activation underlying cognitive control in ecstasy and cannabis users." *Neuroimage* **52**(2):429-35.
- Salo, R., S. Ursu, M. H. Buonocore, M. H. Leamon and C. Carter (2009). "Impaired prefrontal cortical function and disrupted adaptive cognitive control in methamphetamine abusers: a functional magnetic resonance imaging study." *Biol Psychiatry* **65**(8): 706-9.



- Sutherland, M. T., T. J. Ross, D. M. Shakleya, M. A. Huestis and E. A. Stein (2010). "Chronic smoking, but not acute nicotine administration, modulates neural correlates of working memory." *Psychopharmacology (Berl)* **213**(1):29-42.
- Tanabe, J., L. Thompson, E. Claus, M. Dalwani, K. Hutchison and M. T. Banich (2007). "Prefrontal cortex activity is reduced in gambling and nongambling substance users during decision-making." *Hum Brain Mapp* **28**(12): 1276-86.
- Tapert, S. F., A. D. Schweinsburg, S. P. Drummond, M. P. Paulus, S. A. Brown, T. T. Yang and L. R. Frank (2007). "Functional MRI of inhibitory processing in abstinent adolescent marijuana users." *Psychopharmacology (Berl)* **194**(2): 173-83.
- Tomasi, D., R. Z. Goldstein, F. Telang, T. Maloney, N. Alia-Klein, E. C. Caparelli and N. D. Volkow (2007). "Thalamo-cortical dysfunction in cocaine abusers: implications in attention and perception." *Psychiatry Res* **155**(3): 189-201.
- Tomasi, D., R. Z. Goldstein, F. Telang, T. Maloney, N. Alia-Klein, E. C. Caparelli and N. D. Volkow (2007). "Widespread disruption in brain activation patterns to a working memory task during cocaine abstinence." *Brain Res* **1171**: 83-92.
- Volkow, N. D., G. J. Wang, Y. Ma, J. S. Fowler, C. Wong, Y. S. Ding, R. Hitzemann, J. M. Swanson and P. Kalivas (2005). "Activation of orbital and medial prefrontal cortex by methylphenidate in cocaine-addicted subjects but not in controls: relevance to addiction." *J Neurosci* **25**(15): 3932-9.
- Vollstadt-Klein, S., D. Hermann, J. Rabinstein, S. Wichert, O. Klein, G. Ende and K. Mann (2010). "Increased Activation of the ACC During a Spatial Working Memory Task in Alcohol-Dependence Versus Heavy Social Drinking." *Alcohol Clin Exp Res* **34**(5):771-6.
- Yucel, M., D. I. Lubman, B. J. Harrison, A. Fornito, N. B. Allen, R. M. Wellard, K. Roffel, K. Clarke, S. J. Wood, S. D. Forman and C. Pantelis (2007). "A combined spectroscopic and functional MRI investigation of the dorsal anterior cingulate region in opiate addiction." *Mol Psychiatry* **12**(7): 611, 691-702.
- Zhang, X., B. J. Salmeron, T. J. Ross, H. Gu, X. Geng, Y. Yang and E. A. Stein (2011). "Anatomical differences and network characteristics underlying smoking cue reactivity." *Neuroimage* **54**(1): 131-41.
