# Supplementary material
Source: PubMed Central journal article supplement (PMC3462342)
Supplement: NIHMS408806-supplement-Supplemental_3.pdf [file NIHMS408806-supplement-Supplemental_3.pdf]

**Table S3. Functional neuroimaging studies (conducted during 2000-2010) comparing brain activity during cue exposure in addicted individuals (S) and healthy controls (C)**

|                               | Subjects     | Abstinence length | Tool/Task                                                               | Task performance / Craving | PFC results                                                                   | PFC correlations with task or drug use                                                      |
|-------------------------------|--------------|-------------------|-------------------------------------------------------------------------|----------------------------|-------------------------------------------------------------------------------|---------------------------------------------------------------------------------------------|
| <b>Nicotine</b>               |              |                   |                                                                         |                            |                                                                               |                                                                                             |
| Brody, Mandelkern et al. 2002 | 20 S<br>20 C | As usual          | FDG video cues (+ tactile):<br>D, N                                     | S>C D<br>urge, interest    | S>C D>N<br>R vACC 24,32                                                       | <b>Craving (+)</b><br>D>N<br>B OFC 11,47, B<br>DLPFC 9,46, B INS                            |
| Artiges, Ricalens et al. 2009 | 13 S<br>13 C | ≥2 hours          | fMRI emotion recognition after:<br>D, N                                 | S<C D (not N)<br>accuracy  | S>C D>N<br>↑ R DLPFC 10, ↓ R ACC 25, ↓<br>L ACC 32, ↓ R INS                   | <b>FTND (-)</b><br>D>N<br>R INS                                                             |
| Yalachkov, Kaiser et al. 2009 | 15 S<br>15 C | fMRI: NR          | fMRI passive viewing:<br>D, N                                           | NA                         | S>C D (not N)<br>L DLPFC, L MedFG, R<br>subcallosal gyrus 34, ↑ L INS         | <b>FTND (+)</b><br>D>N<br>R MidFG                                                           |
| Zhang, Chen et al. 2009       | 10 S<br>10 C | ≥2 hours          | fMRI passive picture viewing :<br>D, N<br>(masked vs. unmasked stimuli) | NA                         | S>C D>N<br>↑ L DLPFC 9/46 (unmasked)                                          | NR                                                                                          |
| Zhang, Salmeron et al.        | 22 S<br>22 C | ≥2 hours          | ASL passive picture viewing :<br>D, N                                   | NA                         | S>C D>N<br>↑ B dmPFC, ↑ R DLPFC, ↑ B<br>dACC, ↑ B rACC, ↑ L INS               | <b>Lifetime drug use (+)</b><br>D>N<br>rACC<br><b>Lifetime drug use (-)</b><br>D>N<br>DLPFC |
| <b>Alcohol</b>                |              |                   |                                                                         |                            |                                                                               |                                                                                             |
| Grusser, Wrase et al. 2004    | 10 S<br>10 C | 7 weeks           | fMRI passive picture viewing:<br>D, N, A                                | S=C<br>ratings, SCR        | S>C D>N/A<br>L ACC 32, R ACC 33, L SFG<br>10, L MidFG 9, R MedFG 10           | <b>Drug use follow up</b><br>D>N/A<br>mPFC                                                  |
| Myrick, Anton et al. 2004     | 10 S<br>10 C | 24 hours          | fMRI passive picture viewing:<br>D, N, A                                | S>C D<br>craving           | S=C                                                                           | <b>Craving</b><br>D (not N, A)<br>L ACC, L OFC                                              |
| Heinz, Wrase et al. 2007      | 12 S<br>12 C | 2 weeks           | fMRI passive picture viewing:<br>D, N, P, U                             | S>C D<br>arousal ratings   | S>C D>N<br>R SFG 10, R MidFG 6, L ACC<br>24,23<br>S>C P>N<br>R SFG 10, ACC 24 | NS                                                                                          |

|                                  | Subjects               | Abstinence length             | Tool/Task                                                                     | Task performance / Craving                                                                     | PFC results                                                                                                                                       | PFC correlations with task or drug use                                                                                         |
|----------------------------------|------------------------|-------------------------------|-------------------------------------------------------------------------------|------------------------------------------------------------------------------------------------|---------------------------------------------------------------------------------------------------------------------------------------------------|--------------------------------------------------------------------------------------------------------------------------------|
|                                  |                        |                               |                                                                               |                                                                                                | <b>S&gt;C U&gt;N</b><br>L SFG 10, L MedFG 10                                                                                                      |                                                                                                                                |
| de Greck, Supady et al. 2009     | 10 S<br>10 C           | 5 months                      | fMRI monetary gain vs. loss, pictures:<br>D, F, G<br>rated for self-reference | <b>S&lt;C D</b><br>low reference<br><b>S&gt;C D</b><br>high reference<br><b>S=C</b><br>craving | <b>S=C</b><br>L vmPFC                                                                                                                             | NR                                                                                                                             |
| <b>Cocaine</b>                   |                        |                               |                                                                               |                                                                                                |                                                                                                                                                   |                                                                                                                                |
| Garavan, Pankiewicz et al. 2000  | 17 S<br>14 C           | NR                            | fMRI passive video viewing:<br>D, N                                           | <b>S&gt;C D</b><br>craving                                                                     | <b>S&gt;C D (&amp; S D&gt;N)</b><br>L MedFG 9, L MidFG 8,6, R IFG 9, 6, R SFG 10, L ACC 32/24,23                                                  | NR                                                                                                                             |
| <b>Heroin</b>                    |                        |                               |                                                                               |                                                                                                |                                                                                                                                                   |                                                                                                                                |
| Zijlstra, Veltman et al. 2009    | 12 S<br>17 C           | 8 weeks                       | fMRI passive picture viewing:<br>D, N, P                                      | NR                                                                                             | <b>S&lt;C P&gt;BL</b><br>B anterior FC                                                                                                            | NS                                                                                                                             |
| <b>Non-drug</b>                  |                        |                               |                                                                               |                                                                                                |                                                                                                                                                   |                                                                                                                                |
| Crockford, Goodyear et al. 2005  | 10 S<br>10 C           | 5 days                        | fMRI viewing video:<br>G, N<br>(gambling after MRI)                           | <b>S&gt;C</b><br>craving                                                                       | <b>S&gt;C G&gt;N</b><br>R IFG 44, R MidFG 9                                                                                                       | NR                                                                                                                             |
| Reuter, Raedler et al. 2005      | 12 S<br>12 C           | NR                            | fMRI abstract guessing task:<br>W, L                                          | <b>S=C</b>                                                                                     | <b>S&lt;C W&gt;L</b><br>L vmPFC                                                                                                                   | <b>Gambling severity (-)</b><br>W>L<br>L vmPFC                                                                                 |
| Ko, Liu et al. 2009              | 10 S<br>10 C           | 1-30 hours                    | fMRI passive picture viewing:<br>G, N                                         | <b>S&gt;C G</b><br>gaming urge                                                                 | <b>S&gt;C G&gt;N:</b><br>B OFC 47, B medial FC 10,11, R vACC 32, R middle FC 8, R superior FC 9,10, L ACC 32, L superior FC 8, R ACC 23, L INS 13 | <b>Gaming urge &amp; recall</b><br>G>N<br>B ACC 32, L medial FC 10, R superior FC 10, R middle FC 10, R OFC 47, R medial FC 11 |
| Goudriaan, De Ruiter et al. 2010 | 17 Sg<br>18 Sm<br>17 C | Sg: 1 week<br>Sm: 16-18 hours | fMRI press during picture view:<br>G, D, N, BL                                | <b>Sg&gt;C=Sm</b><br>gambling urge<br><b>Sm&gt;C=Sg</b><br>smoking urge                        | <b>Sg&gt;C G&gt;N</b><br>R DLPFC<br><b>Sg&gt;Sm G&gt;N</b><br>B DLPFC, L vIPFC                                                                    | <b>Gambling urge</b><br>G>N (Sg)<br>L vIPFC, L dACC, L INS                                                                     |

|                             | Subjects                   | Abstinence length      | Tool/Task                                               | Task performance / Craving           | PFC results                                                                                                                                | PFC correlations with task or drug use     |
|-----------------------------|----------------------------|------------------------|---------------------------------------------------------|--------------------------------------|--------------------------------------------------------------------------------------------------------------------------------------------|--------------------------------------------|
|                             |                            |                        |                                                         |                                      | <b>Sm&gt;C D&gt;N</b><br>B vmPFC, L vIPFC, B rACC<br><b>Sm&gt;Sg D&gt;N</b><br>B vmPFC, R vIPFC, B rACC                                    | <b>Smoking urge</b><br>D>N (Sm)<br>L vIPFC |
| Uher, Murphy et al. 2004    | <i>26 S</i><br><i>19 C</i> | 4 hours S<br>3 hours C | fMRI passive picture viewing:<br>F, N, U                | <b>S&gt;C F (&amp; U)</b><br>Ratings | <b>S&lt;C F&gt;N</b><br>↑ L PFC 45,46, ↑ L DLPFC 44<br><b>S&gt;C F&gt;N</b><br>↑ L vmPFC/ACC 11,25,32<br><b>An&gt;Bul F</b><br>R PFC 10,47 | NR                                         |
| Miyake, Okamoto et al. 2010 | <i>36 S</i><br><i>12 C</i> | NR                     | fMRI select most negative or neutral words:<br>Bd, N, U | NR                                   | <b>S&gt;C Bd&gt;N</b><br>↑ L vmPFC 9                                                                                                       | NS with body mass index                    |

C controls, S subjects, Sg gamblers, Sm smokers

fMRI functional magnetic resonance imaging, FDG positron emission tomography with [<sup>18</sup>F]fluorodeoxyglucose, SCR skin conductance responses, ASL arterial spin labeling for perfusion

NR not reported, NA not applicable, NS not significant

D drug (within respective category), T Task, N neutral, P pleasant, U unpleasant, F food, G gambling/gaming, A abstract (e.g., scrambled), W win, L loss, Bd body image, BL baseline

ACC anterior cingulate cortex, dACC dorsal ACC, pgACC perigenual ACC, rACC rostral ACC, scACC subcallosal ACC, vACC ventral ACC, FC frontal cortex, aFC anterior FC, mFC middle FC, IFC inferior FC, PFC prefrontal cortex, mPFC medial PFC, dmPFC dorsomedial PFC, vmPFC ventromedial PFC, DLPFC dorsolateral PFC, vIPFC ventrolateral PFC, IFG inferior frontal gyrus, OFC orbitofrontal cortex, mOFC medial OFC, MedFG medial frontal gyrus, MidFG middle frontal gyrus, SFG superior frontal gyrus, INS insula, SMA supplementary motor area

(+) positive correlation, (-) negative correlation

R right, L left, B bilateral, C central

If available: ↑ increase/activation/hyperactivation, ↓ decrease/deactivation/hypoactivation, Brodmann Areas are noted by numbers

Subject column is in italics if groups are matched on at least two of the following: age, sex, race, education

**References**

- Artiges, E., E. Ricalens, S. Berthoz, M. O. Krebs, J. Penttila, C. Trichard and J. L. Martinot (2009). "Exposure to smoking cues during an emotion recognition task can modulate limbic fMRI activation in cigarette smokers." *Addict Biol* **14**(4): 469-77.
- Brody, A. L., M. A. Mandelkern, E. D. London, A. R. Childress, G. S. Lee, R. G. Bota, M. L. Ho, S. Saxena, L. R. Baxter, Jr., D. Madsen and M. E. Jarvik (2002). "Brain metabolic changes during cigarette craving." *Arch Gen Psychiatry* **59**(12): 1162-72.
- Crockford, D. N., B. Goodyear, J. Edwards, J. Quickfall and N. el-Guebaly (2005). "Cue-induced brain activity in pathological gamblers." *Biol Psychiatry* **58**(10): 787-95.
- de Greck, M., A. Supady, R. Thiemann, C. Tempelmann, B. Bogerts, L. Forschner, K. V. Ploetz and G. Northoff (2009). "Decreased neural activity in reward circuitry during personal reference in abstinent alcoholics--a fMRI study." *Hum Brain Mapp* **30**(5): 1691-704.
- Goudriaan, A. E., M. B. De Ruiter, W. Van Den Brink, J. Oosterlaan and D. J. Veltman (2010). "Brain activation patterns associated with cue reactivity and craving in abstinent problem gamblers, heavy smokers and healthy controls: an fMRI study." *Addict Biol* **15**(4): 491-503.
- Grusser, S. M., J. Wrase, S. Klein, D. Hermann, M. N. Smolka, M. Ruf, W. Weber-Fahr, H. Flor, K. Mann, D. F. Braus and A. Heinz (2004). "Cue-induced activation of the striatum and medial prefrontal cortex is associated with subsequent relapse in abstinent alcoholics." *Psychopharmacology (Berl)* **175**(3): 296-302.
- Heinz, A., J. Wrase, T. Kahnt, A. Beck, Z. Bromand, S. M. Grusser, T. Kienast, M. N. Smolka, H. Flor and K. Mann (2007). "Brain activation elicited by affectively positive stimuli is associated with a lower risk of relapse in detoxified alcoholic subjects." *Alcohol Clin Exp Res* **31**(7): 1138-47.
- Miyake, Y., Y. Okamoto, K. Onoda, N. Shirao, Y. Otagaki and S. Yamawaki (2010). "Neural processing of negative word stimuli concerning body image in patients with eating disorders: an fMRI study." *Neuroimage* **50**(3): 1333-9.
- Reuter, J., T. Raedler, M. Rose, I. Hand, J. Glascher and C. Buchel (2005). "Pathological gambling is linked to reduced activation of the mesolimbic reward system." *Nat Neurosci* **8**(2): 147-8.
- Uher, R., T. Murphy, M. J. Brammer, T. Dalgleish, M. L. Phillips, V. W. Ng, C. M. Andrew, S. C. Williams, I. C. Campbell and J. Treasure (2004). "Medial prefrontal cortex activity associated with symptom provocation in eating disorders." *Am J Psychiatry* **161**(7): 1238-46.
- Yalachkov, Y., J. Kaiser and M. J. Naumer (2009). "Brain regions related to tool use and action knowledge reflect nicotine dependence." *J Neurosci* **29**(15): 4922-9.
- Zhang, X., X. Chen, Y. Yu, D. Sun, N. Ma, S. He, X. Hu and D. Zhang (2009). "Masked smoking-related images modulate brain activity in smokers." *Hum Brain Mapp* **30**(3): 896-907.
- Zhang, X., B. J. Salmeron, T. J. Ross, H. Gu, X. Geng, Y. Yang and E. A. Stein (2011). "Anatomical differences and network characteristics underlying smoking cue reactivity." *Neuroimage* **54**(1): 131-41.

Zijlstra, F., D. J. Veltman, J. Booij, W. van den Brink and I. H. Franken (2009). "Neurobiological substrates of cue-elicited craving and anhedonia in recently abstinent opioid-dependent males." Drug Alcohol Depend **99**(1-3): 183-92.
