# Supplementary material
Source: PubMed Central journal article supplement (PMC3462342)
Supplement: NIHMS408806-supplement-Supplemental_4.pdf [file NIHMS408806-supplement-Supplemental_4.pdf]

**Table S4. Functional neuroimaging studies (conducted during 2000-2010) studying effects of abstinence and self-regulation on PFC activity.**

|                               | Subjects          | Abstinence length          | Tool/Task                                           | Task performance / Craving   | PFC results                                                                                                                                                                                        | PFC correlations with task or drug use                                                              |
|-------------------------------|-------------------|----------------------------|-----------------------------------------------------|------------------------------|----------------------------------------------------------------------------------------------------------------------------------------------------------------------------------------------------|-----------------------------------------------------------------------------------------------------|
| <b>Nicotine</b>               |                   |                            |                                                     |                              |                                                                                                                                                                                                    |                                                                                                     |
| Wilson, Sayette et al. 2005   | 10 exp<br>10 nexp | 8 hours                    | fMRI viewing and holding<br>D, N                    | <b>D+N</b><br>craving        | <b>Expecting group</b><br><b>D&gt;N</b><br>L vmPFC 10<br><b>D&lt;N</b><br>B DLPFC 9, R DLPFC 46,<br>R midFG 10, L vIPFC 47<br><b>No expectation group</b><br><b>D&gt;N</b><br>R SFG 10, R midFG 10 | NR                                                                                                  |
| McBride, Barrett et al. 2006  | 19 S              | S: as usual<br>A: 12 hours | fMRI passive video viewing<br>D, N                  | <b>D</b><br>craving          | <b>D&gt;N</b><br>L ACC 24/32, B dmPFC<br>9/10, L mOFC 11, L INS<br>13<br><b>D&gt;N S</b><br>L ACC 24/32<br><b>D&gt;N A=S</b>                                                                       | NR                                                                                                  |
| Brody, Mandelkern et al. 2007 | 42 S              | 25 min                     | fMRI video cues<br>Dc, Di, N                        | <b>Dc/Di&gt;N</b><br>craving | <b>Di&gt;N</b><br>B SFG, L dACC<br><b>Di&gt;Dc</b><br>L SFG, L pgACC, L dACC                                                                                                                       | <b>Craving (+)</b><br>B ACC/SFG, B<br>IFG/INS, L<br>MidFG                                           |
| Wang, Faith et al. 2007       | 14 S              | S: 1 hour<br>A: 12 hours   | Resting state arterial spin<br>labeling: global CBF | <b>A&gt;S</b><br>craving     | <b>A&gt;S</b><br>↑ ACC/mOFC, ↑ L OFC,<br>↓ R PFC                                                                                                                                                   | <b>Craving (+)</b><br>A>S<br>ACC, B OFC,<br>mOFC, B<br>DLPFC, R INS<br><b>Withdrawal</b><br>R DLPFC |
| Janes, Frederick et al. 2009  | 13 S              | S: as usual<br>A: 8 days   | fMRI passive picture viewing<br>D, N                | NR                           | <b>D&gt;N A&gt;S</b><br>R SFG 9,46, L MidFG<br>6,9, L IFG 6,44, B ACC                                                                                                                              | NR                                                                                                  |

|                               | Subjects | Abstinence length                             | Tool/Task                                                    | Task performance / Craving            | PFC results                                                                                                              | PFC correlations with task or drug use                                                                                         |
|-------------------------------|----------|-----------------------------------------------|--------------------------------------------------------------|---------------------------------------|--------------------------------------------------------------------------------------------------------------------------|--------------------------------------------------------------------------------------------------------------------------------|
|                               |          |                                               |                                                              |                                       | 24,32                                                                                                                    |                                                                                                                                |
| McClernon, Kozink et al. 2009 | 18 S     | S: as usual<br>A: 24 hours                    | fMRI passive picture viewing<br>D, N                         | <b>D</b><br>craving                   | <b>D&gt;N A</b><br>L SFG 8,9<br><b>D&gt;N A&gt;S</b><br>L SFG 6                                                          | <b>Craving (+)</b><br>D>N A<br>R SFG 6,10, R<br>ACC 32                                                                         |
| Azizian, Nestor et al. 2010   | 20 S     | S: 15 min<br>A: 12 hours                      | fMRI color-word Stroop                                       | <b>A&gt;S</b><br>craving, RT (longer) | <b>A&gt;S T&gt;N</b><br>R ACC<br><b>A&lt;S T&gt;N</b><br>R MidFG 9                                                       | NS                                                                                                                             |
| Kober, Kross et al. 2010      | 21 S     | 2 hours                                       | fMRI picture viewing<br>NOW or LATER<br>consequences<br>D, F | <b>Now&gt;Later D&gt;F</b><br>craving | <b>Now&gt;Later</b><br>L mPFC/mOFC, L dACC,<br>L rACC, R ACC<br><b>Now&lt;Later</b><br>L dmPFC, B IFG, L<br>DLPFC, vIPFC | <b>Craving (+)</b><br>R dACC<br><b>Craving (-)</b><br>L DLPFC                                                                  |
| Kozink, Kollins et al. 2010   | 15 S     | S: as usual<br>A: 24 hours                    | fMRI go/no-go                                                | <b>A&lt;S</b><br>accuracy             | <b>A&gt;S T&gt;BL</b><br>↑ R IFC                                                                                         | NR                                                                                                                             |
| Kushnir, Menon et al. 2010    | 18 S     | S: 30 minutes<br>A: 10-12 hours<br>(same day) | fMRI passive picture viewing<br>D, N                         | <b>A&gt;S</b><br>craving              | NR                                                                                                                       | <b>Depression (+)</b><br>D>N<br>R IFG, B<br>MidFG, L ACC,<br>L SFG, L<br>MedFG, R ACC<br><b>Depression (-)</b><br>D>N<br>R SFG |
| <b>Alcohol</b>                |          |                                               |                                                              |                                       |                                                                                                                          |                                                                                                                                |
| Filbey, Claus et al. 2008     | 37 S     | 24 hours                                      | fMRI preferred taste<br>D, N                                 | <b>D=N</b><br>Urge                    | <b>D&gt;BL &amp; D&gt;N</b><br>B OFC, vmPFC, B IFG 45<br><b>D&gt;N</b><br>L ACC 24, L OFC 47, L<br>MidFG 6, R IFG 45     | <b>Drug use (+)</b><br>D>N<br>B OFC, vmPFC<br><b>Craving</b><br>D>BL                                                           |

|                                | Subjects     | Abstinence length         | Tool/Task                            | Task performance / Craving              | PFC results                                                                                                            | PFC correlations with task or drug use |
|--------------------------------|--------------|---------------------------|--------------------------------------|-----------------------------------------|------------------------------------------------------------------------------------------------------------------------|----------------------------------------|
|                                |              |                           |                                      |                                         |                                                                                                                        | R OFC, mPFC                            |
| <b>Heroin</b>                  |              |                           |                                      |                                         |                                                                                                                        |                                        |
| Langleben, Ruparel et al. 2008 | 15 S         | S: 90 min<br>A: ~24 hours | fMRI passive picture viewing<br>D, N | <b>A&gt;S D</b><br>craving              | <b>D A&gt;S</b><br>B OFC, B INS                                                                                        | NR                                     |
| <b>Cocaine</b>                 |              |                           |                                      |                                         |                                                                                                                        |                                        |
| Volkow, Fowler et al. 2010     | 24 S         | 3 days                    | FDG video viewing<br>D, Di           | <b>D&gt;Di</b><br>craving               | <b>Di, D&lt;BL</b><br>↑ R ACC 32<br><b>Di&lt;BL</b><br>↑ R INS, ↑ R mOFC 25, L OFC 25<br><b>Di&lt;D</b><br>↑ R mOFC 25 | <b>Craving</b><br>D>Di<br>mPFC 8,10    |
| <b>Non-drug</b>                |              |                           |                                      |                                         |                                                                                                                        |                                        |
| Pelchat, Johnson et al. 2004   | 10 S<br>10 C | 1.5 days                  | fMRI imagine foods<br>S, A           | <b>A&gt;S</b><br>craving to liked foods | <b>A&gt;S</b><br>L ACC 24, L INS                                                                                       | NR                                     |

C controls, S subjects, exp expecting to smoke, nexp not expecting to smoke, fMRI functional magnetic resonance imaging, CBF Cerebral Blood Flow, NR not reported, NA not applicable, NS not significant, A Abstinence, S Satiety

D drug (within respective category), N neutral, F food, Dc instruction to crave drug, Di instruction to inhibit/resist craving, T Task, BL baseline, RT reaction time

ACC anterior cingulate cortex, dACC dorsal ACC, pgACC perigenual ACC, rACC rostral ACC, scACC subcallosal ACC, vACC ventral ACC, FC frontal cortex, aFC anterior FC, mFC middle FC, IFC inferior FC, PFC prefrontal cortex, mPFC medial PFC, dmPFC dorsomedial PFC, vmPFC ventromedial PFC, DLPFC dorsolateral PFC, vlPFC ventrolateral PFC, IFG inferior frontal gyrus, OFC orbitofrontal cortex, mOFC medial OFC, MedFG medial frontal gyrus, MidFG middle frontal gyrus, SFG superior frontal gyrus, INS insula, SMA supplementary motor area

(+) positive correlation, (-) negative correlation, R right; L left, B bilateral, C central

If available: ↑ increase/activation/hyperactivation, ↓ decrease/deactivation/hypoactivation, Brodmann Areas are noted by numbers

**References**

- Azizian, A., L. J. Nestor, D. Payer, J. R. Monterosso, A. L. Brody and E. D. London (2010). "Smoking reduces conflict-related anterior cingulate activity in abstinent cigarette smokers performing a stroop task." *Neuropsychopharmacology* **35**(3): 775-82.
- Brody, A. L., M. A. Mandelkern, R. E. Olmstead, J. Jou, E. Tiongson, V. Allen, D. Scheibal, E. D. London, J. R. Monterosso, S. T. Tiffany, A. Korb, J. J. Gan and M. S. Cohen (2007). "Neural substrates of resisting craving during cigarette cue exposure." *Biol Psychiatry* **62**(6): 642-51.
- Janes, A. C., B. Frederick, S. Richardt, C. Burbridge, E. Merlo-Pich, P. F. Renshaw, A. E. Evins, M. Fava and M. J. Kaufman (2009). "Brain fMRI reactivity to smoking-related images before and during extended smoking abstinence." *Exp Clin Psychopharmacol* **17**(6): 365-73.
- Kober, H., E. F. Kross, W. Mischel, C. L. Hart and K. N. Ochsner (2010). "Regulation of craving by cognitive strategies in cigarette smokers." *Drug Alcohol Depend* **106**(1): 52-5.
- Kozink, R. V., S. H. Kollins and F. J. McClernon (2010). "Smoking Withdrawal Modulates Right Inferior Frontal Cortex but not Presupplementary Motor Area Activation During Inhibitory Control." *Neuropsychopharmacology* **35**(13): 2600-6.
- Kushnir, V., M. Menon, X. L. Balducci, P. Selby, U. Busto and L. Zawertailo (2010). "Enhanced smoking cue salience associated with depression severity in nicotine-dependent individuals: a preliminary fMRI study." *Int J Neuropsychopharmacol*: 1-12.
- Langleben, D. D., K. Ruparel, I. Elman, S. Busch-Winokur, R. Pratiwadi, J. Loughhead, C. P. O'Brien and A. R. Childress (2008). "Acute effect of methadone maintenance dose on brain FMRI response to heroin-related cues." *Am J Psychiatry* **165**(3): 390-4.
- McBride, D., S. P. Barrett, J. T. Kelly, A. Aw and A. Dagher (2006). "Effects of expectancy and abstinence on the neural response to smoking cues in cigarette smokers: an fMRI study." *Neuropsychopharmacology* **31**(12): 2728-38.
- Volkow, N. D., J. S. Fowler, G. J. Wang, F. Telang, J. Logan, M. Jayne, Y. Ma, K. Pradhan, C. Wong and J. M. Swanson (2010). "Cognitive control of drug craving inhibits brain reward regions in cocaine abusers." *Neuroimage* **49**(3): 2536-43.
- Wang, Z., M. Faith, F. Patterson, K. Tang, K. Kerrin, E. P. Wileyto, J. A. Detre and C. Lerman (2007). "Neural substrates of abstinence-induced cigarette cravings in chronic smokers." *J Neurosci* **27**(51): 14035-40.
- Wilson, S. J., M. A. Sayette, M. R. Delgado and J. A. Fiez (2005). "Instructed smoking expectancy modulates cue-elicited neural activity: a preliminary study." *Nicotine Tob Res* **7**(4): 637-45.
