# Supplementary material
Source: PubMed Central journal article supplement (PMC3462342)
Supplement: NIHMS408806-supplement-Supplemental_5.pdf [file NIHMS408806-supplement-Supplemental_5.pdf]

**Table S5. Functional neuroimaging studies (conducted during 2000-2010) comparing PFC activity in addicted individuals (S) and healthy controls (C) during performance of selected emotion tasks.**

|                                     | Subjects               | Abstinence length            | Task                                   | Performance Differences                                                        | Group PFC differences                                                                                                                                                                                                | Correlations with task or drug use                                            |
|-------------------------------------|------------------------|------------------------------|----------------------------------------|--------------------------------------------------------------------------------|----------------------------------------------------------------------------------------------------------------------------------------------------------------------------------------------------------------------|-------------------------------------------------------------------------------|
| <b>MOTIVATION</b>                   |                        |                              |                                        |                                                                                |                                                                                                                                                                                                                      |                                                                               |
| <b>Cocaine</b>                      |                        |                              |                                        |                                                                                |                                                                                                                                                                                                                      |                                                                               |
| Goldstein, Alia-Klein et al. 2007   | 16 S<br>13 C           | 5 days                       | fMRI money for go/no-go                | <b>S&lt;C T&amp;N</b><br>accuracy                                              | <b>S&lt;C T&gt;N</b><br>↑ L OFC 47, R OFC 13,44,45, ↑ L DLPFC 9,10                                                                                                                                                   | <b>Reaction time (-)</b><br>T>N<br>L DLPFC 10                                 |
| Goldstein, Alia-Klein et al. 2009   | 17 S<br>17 C           | 5 days                       | fMRI pressing for word color for money | <b>S=C</b>                                                                     | <b>S&lt;C T&gt;BL</b><br>↑ R dACC 32<br><b>S&gt;C T&gt;BL</b><br>↓ L rvACC/mOFC 10,11, ↑ L DLPFC 6,8, ↑ L dmPFC 6                                                                                                    | <b>Drug use (-)</b><br>T>BL<br>L dACC<br><b>Craving (+)</b><br>T>BL<br>L vACC |
| <b>Nicotine</b>                     |                        |                              |                                        |                                                                                |                                                                                                                                                                                                                      |                                                                               |
| Buhler, Vollstadt-Klein et al. 2010 | 21 S<br>21 C           | Sat: as usual<br>A: 36 hours | fMRI instrumental motivation           | <b>C: money &gt; cigarettes</b><br><b>S: money = cigarettes</b><br># responses | <b>S&lt;C Money&gt;Cigarettes</b><br>↑ R OFC 11, R SFG 9,10, L ACC 24,32<br><b>A&gt;Sat T&gt;BL</b><br>R mPFC                                                                                                        | <b># responses (+)</b><br>T>BL<br>SFG                                         |
| <b>Non Drug</b>                     |                        |                              |                                        |                                                                                |                                                                                                                                                                                                                      |                                                                               |
| de Ruiter, Veltman et al. 2009      | 19 Sg<br>19 Sm<br>19 C | 10 hours                     | fMRI reversal learning and ToL         | <b>Sg&lt;Sm&lt;C</b><br>money won                                              | <b>Sg&lt;C T(gain)&gt;BL</b><br>R vIPFC<br><b>Sm&gt;C T(gain)&gt;BL</b><br>R DLPFC, R INS<br><b>Sm&lt;C T(loss)&gt;BL</b><br>R vIPFC<br><b>Sm&gt;C T(loss)&gt;BL</b><br>R frontal operculum, R INS<br><b>S=C ToL</b> | NR                                                                            |
| <b>EMOTION</b>                      |                        |                              |                                        |                                                                                |                                                                                                                                                                                                                      |                                                                               |
| <b>Alcohol</b>                      |                        |                              |                                        |                                                                                |                                                                                                                                                                                                                      |                                                                               |
| Salloum, Ramchandani et al. 2007    | 11 S<br>11 C           | 19 days                      | fMRI facial emotion intensity judgment | <b>S=C</b>                                                                     | <b>S&lt;C T&gt;BL</b><br>L IFG 9, L MidFG 6, L MedFG 6, L rACC 32,24,24/32, B scACC 25,                                                                                                                              | NR                                                                            |

|                              |                |            |                                             |                                   |                                                                                                          |                                      |
|------------------------------|----------------|------------|---------------------------------------------|-----------------------------------|----------------------------------------------------------------------------------------------------------|--------------------------------------|
|                              |                |            |                                             |                                   | L dACC 32, B INS 13<br><b>S&gt;C T&gt;BL</b><br>L MidFG 9,46, R dACC 24,<br>B INS 13                     |                                      |
| Heitzeg, Nigg et al. 2008    | 11 Sv<br>11 Sr | NR         | fMRI press for emotional words              | <b>Sv=Sr</b>                      | <b>Sv&lt;Sr T&gt;N</b><br>↑ B OFC 11, L INS<br><b>Sv&gt;Sr T&gt;N</b><br>↑ R dmPFC 8/9/10<br>R mPFC 9,10 | NR                                   |
| <b>Methamphetamine</b>       |                |            |                                             |                                   |                                                                                                          |                                      |
| Payer, Lieberman et al. 2008 | 12 S<br>12 C   | 9 days     | fMRI facial emotion match                   | <b>S=C</b>                        | <b>S&lt;C T&gt;N</b><br>R vIPFC 47<br><b>S&gt;C T&gt;N</b><br>L ACC 24                                   | NR                                   |
| Kim, Lee et al. 2010         | 19 S<br>19 C   | 21 days    | fMRI empathy                                | <b>S&lt;C T&amp;N</b><br>accuracy | <b>S&lt;C T&gt;N</b><br>OFC<br><b>S&gt;C T&gt;N</b><br>DLPFC                                             | S: NS<br>C: NR                       |
| Payer, Lieberman et al. 2010 | 36 S<br>33 C   | >4 days    | fMRI facial emotion match & label           | NR                                | <b>S&lt;C T&gt;N</b><br>B IFG                                                                            | NS                                   |
| <b>Marijuana</b>             |                |            |                                             |                                   |                                                                                                          |                                      |
| Gruber, Rogowska et al. 2009 | 15 S<br>15 C   | 12 hours   | fMRI masked facial affect                   | NA                                | <b>S&lt;C T&gt;BL</b><br>L ACC 32<br><b>S&gt;C T&gt;BL</b><br>R IFG 9, R SFG                             | <b>Drug use (+)</b><br>T>BL<br>B ACC |
| <b>Heroin</b>                |                |            |                                             |                                   |                                                                                                          |                                      |
| Wang, Zhang et al. 2010      | 17 S<br>16 C   | 2-5 months | fMRI IAPS passive viewing                   | <b>S=C</b><br>valence ratings     | <b>S=C T&gt;N</b><br>PFC                                                                                 | NR                                   |
| <b>Cocaine</b>               |                |            |                                             |                                   |                                                                                                          |                                      |
| Asensio, Romero et al. 2010  | 32 S<br>26 C   | >72 hours  | fMRI letter discrimination on emotional set | <b>S=C</b>                        | <b>S&lt;C P&gt;N</b><br>B MidFG 6, B dmPFC 32/6<br><b>S&gt;C U&gt;P</b><br>B DLPFC 6/8/9                 | NS                                   |

C controls, S subjects, Sr resilient and Sv vulnerable (by family hx), Sg pathological gamblers, Sm smokers  
fMRI functional magnetic resonance imaging, IAPS International Affective Picture System, ToL Tower of London  
NR not reported, NA not applicable, NS not significant

A Abstinence, S Satiety

T Task, N neutral, P pleasant, U unpleasant, BL baseline

ACC anterior cingulate cortex, dACC dorsal ACC, pgACC perigenual ACC, rACC rostral ACC, scACC subcallosal ACC, vACC ventral ACC, FC frontal cortex, aFC anterior FC, mFC middle FC, IFC inferior FC, PFC prefrontal cortex, mPFC medial PFC, dmPFC dorsomedial PFC, vmPFC ventromedial PFC, DLPFC dorsolateral PFC, vlPFC ventrolateral PFC, IFG inferior frontal gyrus, OFC orbitofrontal cortex, mOFC medial OFC, MedFG medial frontal gyrus, MidFG middle frontal gyrus, SFG superior frontal gyrus, INS insula, SMA supplementary motor area

(+) positive correlation, (-) negative correlation

R right; L left, B bilateral, C central

If available: ↑ increase/activation/hyperactivation, ↓ decrease/deactivation/hypoactivation, Brodmann Areas are noted by numbers

**References**

- Asensio, S., M. J. Romero, C. Palau, A. Sanchez, I. Senabre, J. L. Morales, R. Carcelen and F. J. Romero (2010). "Altered neural response of the appetitive emotional system in cocaine addiction: an fMRI Study." *Addict Biol* **15**(14): 504-16.
- Buhler, M., S. Vollstadt-Klein, A. Kobiella, H. Budde, L. J. Reed, D. F. Braus, C. Buchel and M. N. Smolka (2010). "Nicotine dependence is characterized by disordered reward processing in a network driving motivation." *Biol Psychiatry* **67**(8): 745-52.
- de Ruiter, M. B., D. J. Veltman, A. E. Goudriaan, J. Oosterlaan, Z. Sjoerds and W. van den Brink (2009). "Response perseveration and ventral prefrontal sensitivity to reward and punishment in male problem gamblers and smokers." *Neuropsychopharmacology* **34**(4): 1027-38.
- Goldstein, R. Z., N. Alia-Klein, D. Tomasi, J. H. Carrillo, T. Maloney, P. A. Woicik, R. Wang, F. Telang and N. D. Volkow (2009). "Anterior cingulate cortex hypoactivations to an emotionally salient task in cocaine addiction." *Proc Natl Acad Sci U S A* **106**(23): 9453-8.
- Goldstein, R. Z., N. Alia-Klein, D. Tomasi, L. Zhang, L. A. Cottone, T. Maloney, F. Telang, E. C. Caparelli, L. Chang, T. Ernst, D. Samaras, N. K. Squires and N. D. Volkow (2007). "Is decreased prefrontal cortical sensitivity to monetary reward associated with impaired motivation and self-control in cocaine addiction?" *Am J Psychiatry* **164**(1): 43-51.
- Gruber, S. A., J. Rogowska and D. A. Yurgelun-Todd (2009). "Altered affective response in marijuana smokers: an FMRI study." *Drug Alcohol Depend* **105**(1-2): 139-53.
- Heitzeg, M. M., J. T. Nigg, W. Y. Yau, J. K. Zubieta and R. A. Zucker (2008). "Affective circuitry and risk for alcoholism in late adolescence: differences in frontostriatal responses between vulnerable and resilient children of alcoholic parents." *Alcohol Clin Exp Res* **32**(3): 414-26.
- Kim, Y. T., J. J. Lee, H. J. Song, J. H. Kim, D. H. Kwon, M. N. Kim, D. S. Yoo, H. J. Lee, H. J. Kim and Y. Chang (2010). "Alterations in cortical activity of male methamphetamine abusers performing an empathy task: fMRI study." *Hum Psychopharmacol* **25**(1): 63-70.
- Payer, D. E., M. D. Lieberman and E. D. London (2011). "Neural Correlates of Affect Processing and Aggression in Methamphetamine Dependence." *Arch Gen Psychiatry* **68**(3):271-82.
- Payer, D. E., M. D. Lieberman, J. R. Monterosso, J. Xu, T. W. Fong and E. D. London (2008). "Differences in cortical activity between methamphetamine-dependent and healthy individuals performing a facial affect matching task." *Drug Alcohol Depend* **93**(1-2): 93-102.
- Wang, Z. X., J. X. Zhang, Q. L. Wu, N. Liu, X. P. Hu, R. C. Chan, Z. W. Xiao. (2010). "Alterations in the processing of non-drug-related affective stimuli in abstinence heroin addicts." *Neuroimage* **49**(1): 971-6.
