# Supplementary material
Source: PubMed Central journal article supplement (PMC3462342)
Supplement: NIHMS408806-supplement-Supplemental_6.pdf [file NIHMS408806-supplement-Supplemental_6.pdf]

**Table S6. Functional neuroimaging studies (conducted during 2000-2010) comparing PFC activity in addicted individuals (S) and healthy controls (C) during performance of inhibitory control tasks.**

|                                  | Subjects     | Abstinence length | Task                                  | Performance Differences | PFC results: dependent variable                                                            | Correlations with task or drug use       |
|----------------------------------|--------------|-------------------|---------------------------------------|-------------------------|--------------------------------------------------------------------------------------------|------------------------------------------|
| <b>INHIBITORY CONTROL</b>        |              |                   |                                       |                         |                                                                                            |                                          |
| <b>Cocaine</b>                   |              |                   |                                       |                         |                                                                                            |                                          |
| Kaufman, Ross et al. 2003        | 13 S<br>14 C | 18-72 hrs         | fMRI go/no-go                         | S>C errors              | S<C T>BL<br>R ACC 24, 6/32, R ACC/MedFG/SFG 6/8/32, R INS 47, R MedFG 6, L IFG 6, L INS 13 | NR                                       |
| Bolla, Ernst et al. 2004         | 13 S<br>13 C | ~23 days          | H <sub>2</sub> <sup>15</sup> O Stroop | S=C                     | S<C T>N<br>L ACC 32, R LPFC 10<br>S>C T>N<br>R ACC 32                                      | Drug use (-)<br>R rACC 24, R LPFC 13     |
| Hester and Garavan 2004          | 15 S<br>15 C | 41 hrs            | fMRI go/no-go + WM                    | S>C errors              | S<C T>N<br>L ACC 32/24, R SFG 10/9                                                         | Inhibition ACC                           |
| Li, Huang et al. 2008            | 15 S<br>15 C | ≥2 weeks          | fMRI SSRT                             | S=C                     | S<C T>N (stop success)<br>↑ rACC 32/24                                                     | Inhibition (-)<br>T>N<br>dmPFC 8         |
| <b>Marijuana</b>                 |              |                   |                                       |                         |                                                                                            |                                          |
| Eldreth, Matochik et al. 2004    | 11 S<br>11 C | ~23 days          | H <sub>2</sub> <sup>15</sup> O Stroop | S=C                     | S<C T>N<br>L DLPFC 8,9, L pgACC 32, R vmPFC 10, R DLPFC 10                                 | NR                                       |
| Tapert, Schweinsburg et al. 2007 | 16 S<br>17 C | 58 days           | fMRI go/no-go                         | S=C (adolescents)       | S>C T>BL<br>B SFG/MidFG 10,46, R MidFG/INS 6,13, B MedFC 6, R IFG/INS 44, 13               | Duration use (-)<br>T>BL<br>↑ R DLPFC 10 |
| Hester, Nestor et al. 2009       | 16 S<br>16 C | 38 hours          | fMRI error awareness                  | S<C Error awareness     | S (not C) T>N<br>↑ B MidFG, ↑ R ACC                                                        | Drug use (-)<br>T>BL<br>R ACC, R INS     |
| <b>Alcohol</b>                   |              |                   |                                       |                         |                                                                                            |                                          |
| De Rosa, Desmond et al. 2004     | 11 S<br>13 C | 100 days          | fMRI proactive interference           | S=C                     | S<C T>N<br>L vmOFC/rectal, L IFG, R mOFC, R pOFC<br>S>C T>N                                | NR                                       |

|                              |                            |                                           |                                   |                                                       |                                                                                                                                              |                                                                                                                  |
|------------------------------|----------------------------|-------------------------------------------|-----------------------------------|-------------------------------------------------------|----------------------------------------------------------------------------------------------------------------------------------------------|------------------------------------------------------------------------------------------------------------------|
|                              |                            |                                           |                                   |                                                       | L IFG, L ACC                                                                                                                                 |                                                                                                                  |
| Li, Luo et al. 2009          | 24 S<br>24 C               | 2 weeks                                   | fMRI SSRT                         | <b>S&gt;C</b><br>Reaction time, % stops               | <b>S&lt;C T&gt;N (slowing, risk)</b><br>B DLPFC, R MidFG, R INS, B mOFC, L ACC<br><b>S&gt;C T&lt;N (stop error)</b><br>B SFG, B MidFG, L ACC | <b>Craving (-)</b><br>T>N<br>R DLPFC                                                                             |
| Heitzeg, Nigg et al. 2010    | 21 S+fh<br>20 C+fh<br>20 C | NR                                        | fMRI go/no-go                     | <b>S=C</b>                                            | <b>S&gt;C T&gt;N</b><br>↑ B OFC 10, ↑ L mPFC 9,<br>↑ L mDPFC 8                                                                               | <b>Drug use (+)</b><br>B OFC 10, L MedPFC 9, L mDPFC 8<br><b>Reaction time (+)</b><br>T>N<br>L mPFC 9, L mDPFC 8 |
| <b>Nicotine</b>              |                            |                                           |                                   |                                                       |                                                                                                                                              |                                                                                                                  |
| Luijten, Veltman et al. 2011 | 18 S<br>19 C               | 3 hours                                   | fMRI attention bias line counting | <b>S=C</b>                                            | <b>S&lt;C T&gt;BL</b><br>R rvACC<br><b>S&gt;C D&gt;N (&amp;D bias&gt;name)</b><br>R dACC                                                     | NS                                                                                                               |
| <b>Methamphetamine</b>       |                            |                                           |                                   |                                                       |                                                                                                                                              |                                                                                                                  |
| Leland, Arce et al. 2008     | 19 S<br>19 C               | 34 days                                   | fMRI cued go/no-go                | <b>S (not C) T&gt;N</b><br>False alarm rate advantage | <b>S&gt;C T&gt;N</b><br>L vACC, C dACC                                                                                                       | <b>False alarm (-)</b><br>T>N<br>L vACC                                                                          |
| Salo, Ursu et al. 2009       | 12 S<br>16 C               | 4 months                                  | fMRI Stroop                       | <b>S&lt;C T&gt;N</b><br>Reaction time advantage       | <b>S&lt;C T&gt;N</b><br>↑ R MidFG 6, R ACC 32,<br>B SFG 6, R SFG 8                                                                           | NR                                                                                                               |
| <b>Heroin</b>                |                            |                                           |                                   |                                                       |                                                                                                                                              |                                                                                                                  |
| Yucel, Lubman et al. 2007    | 24 S<br>24 C               | Morning opiate dose<br>24 hours all other | fMRI MSIT                         | <b>S=C</b>                                            | <b>S&gt;C T&gt;N</b><br>L DLPFC 9                                                                                                            | <b>Reaction time, error (+)</b><br>T>N<br>dACC 32                                                                |
| Fu, Bi et al. 2008           | 28 S<br>15 C               | 8 weeks                                   | fMRI go/no-go                     | <b>S&gt;C</b><br>Reaction time                        | <b>S&lt;C T&gt;N</b><br>L MidFG 10, L MedFG 10,<br>R MedFG 9/32, R IFG 9, L IFG 45, B ACC 9, L INS 13                                        | NR                                                                                                               |
| <b>MDMA</b>                  |                            |                                           |                                   |                                                       |                                                                                                                                              |                                                                                                                  |

|                          |                            |         |               |            |                                                                                |    |
|--------------------------|----------------------------|---------|---------------|------------|--------------------------------------------------------------------------------|----|
| Roberts and Garavan 2010 | <i>20 S</i><br><i>20 C</i> | 16 days | fMRI go/no-go | <b>S=C</b> | <b>S&gt;C T&gt;BL</b><br>↑ R MidFG, IFG 46,10,<br>MidFG 9,8,6, ↑ L MedFG<br>10 | NS |
|--------------------------|----------------------------|---------|---------------|------------|--------------------------------------------------------------------------------|----|

C controls, S subjects, +fh with family history of alcohol use disorders

MDMA 3,4-Methylenedioxyamphetamine or Ecstasy, fMRI functional magnetic resonance imaging, H<sub>2</sub><sup>15</sup>O positron emission tomography with H<sub>2</sub><sup>15</sup>O for cerebral blood flow

NR not reported, NA not applicable, NS not significant

A Abstinence, S Satiety

WM working memory, SSRT stop signal reaction time task, MSIT multi-source interference task,

D drug (within respective category), N neutral, T Task, BL baseline

ACC anterior cingulate cortex, dACC dorsal ACC, pgACC perigenual ACC, rACC rostral ACC, scACC subcallosal ACC, vACC ventral ACC, FC frontal cortex, aFC anterior FC, mFC middle FC, IFC inferior FC, PFC prefrontal cortex, mPFC medial PFC, dmPFC dorsomedial PFC, vmPFC ventromedial PFC, DLPFC dorsolateral PFC, vIPFC ventrolateral PFC, IFG inferior frontal gyrus, OFC orbitofrontal cortex, mOFC medial OFC, MedFG medial frontal gyrus, MidFG middle frontal gyrus, SFG superior frontal gyrus, INS insula, SMA supplementary motor area

(+) positive correlation, (-) negative correlation

R right, L left, B bilateral, C central

If available: ↑ increase/activation/hyperactivation, ↓ decrease/deactivation/hypoactivation, Brodmann Areas are noted by numbers

Subject column is in italics if groups are matched on at least two of the following: age, sex, race, education

**References**

- Bolla, K., M. Ernst, K. Kiehl, M. Mouratidis, D. Eldreth, C. Contoreggi, J. Matochik, V. Kurian, J. Cadet, A. Kimes, F. Funderburk and E. London (2004). "Prefrontal cortical dysfunction in abstinent cocaine abusers." *J Neuro psychiatry Clin Neurosci* **16**(4): 456-64.
- De Rosa, E., J. E. Desmond, A. K. Anderson, A. Pfefferbaum and E. V. Sullivan (2004). "The human basal forebrain integrates the old and the new." *Neuron* **41**(5): 825-37.
- Eldreth, D. A., J. A. Matochik, J. L. Cadet and K. I. Bolla (2004). "Abnormal brain activity in prefrontal brain regions in abstinent marijuana users." *Neuroimage* **23**(3): 914-20.
- Fu, L. P., G. H. Bi, Z. T. Zou, Y. Wang, E. M. Ye, L. Ma, F. Ming and Z. Yang (2008). "Impaired response inhibition function in abstinent heroin dependents: an fMRI study." *Neurosci Lett* **438**(3): 322-6.
- Heitzeg, M. M., J. T. Nigg, W. Y. Yau, R. A. Zucker and J. K. Zubieta (2010). "Striatal Dysfunction Marks Preexisting Risk and Medial Prefrontal Dysfunction Is Related to Problem Drinking in Children of Alcoholics." *Biol Psychiatry* **68**(3): 287-295.
- Hester, R. and H. Garavan (2004). "Executive dysfunction in cocaine addiction: evidence for discordant frontal, cingulate, and cerebellar activity." *J Neurosci* **24**(49): 11017-22.
- Hester, R., L. Nestor and H. Garavan (2009). "Impaired error awareness and anterior cingulate cortex hypoactivity in chronic cannabis users." *Neuropharmacology* **34**(11): 2450-8.
- Kaufman, J. N., T. J. Ross, E. A. Stein and H. Garavan (2003). "Cingulate hypoactivity in cocaine users during a GO-NOGO task as revealed by event-related functional magnetic resonance imaging." *J Neurosci* **23**(21): 7839-43.
- Li, C. S., C. Huang, P. Yan, Z. Bhagwagar, V. Milivojevic and R. Sinha (2008). "Neural correlates of impulse control during stop signal inhibition in cocaine-dependent men." *Neuropsychopharmacology* **33**(8): 1798-806.
- Li, C. S., X. Luo, P. Yan, K. Bergquist and R. Sinha (2009). "Altered impulse control in alcohol dependence: neural measures of stop signal performance." *Alcohol Clin Exp Res* **33**(4): 740-50.
- Luijten, M., D. J. Veltman, W. van den Brink, R. Hester, M. Field, M. Smits and I. H. Franken (2011). "Neurobiological substrate of smoking related attentional bias." *Neuroimage* **54**(3): 2374-81.
- Roberts, G. M. and H. Garavan (2010). "Evidence of increased activation underlying cognitive control in ecstasy and cannabis users." *Neuroimage* **52**(2): 429-35.
- Salo, R., S. Ursu, M. H. Buonocore, M. H. Leamon and C. Carter (2009). "Impaired prefrontal cortical function and disrupted adaptive cognitive control in methamphetamine abusers: a functional magnetic resonance imaging study." *Biol Psychiatry* **65**(8): 706-9.
- Tapert, S. F., A. D. Schweinsburg, S. P. Drummond, M. P. Paulus, S. A. Brown, T. T. Yang and L. R. Frank (2007). "Functional MRI of inhibitory processing in abstinent adolescent marijuana users." *Psychopharmacology (Berl)* **194**(2): 173-83.

Yucel, M., D. I. Lubman, B. J. Harrison, A. Fornito, N. B. Allen, R. M. Wellard, K. Roffel, K. Clarke, S. J. Wood, S. D. Forman and C. Pantelis (2007). "A combined spectroscopic and functional MRI investigation of the dorsal anterior cingulate region in opiate addiction." Mol Psychiatry **12**(7): 611, 691-702.
