# Supplementary material
Source: PubMed Central journal article supplement (PMC3462342)

**Supplementary online information S8 (figure). Recent neuroimaging studies of PFC activity in drug-addicted individuals.** A glass brain shown in three planes (axial, sagittal, coronal). All plotted xyz coordinates are within 10 mm of the surface shown. Studies/results included and color coding are the same as in Figure 2. R is right; L is left.

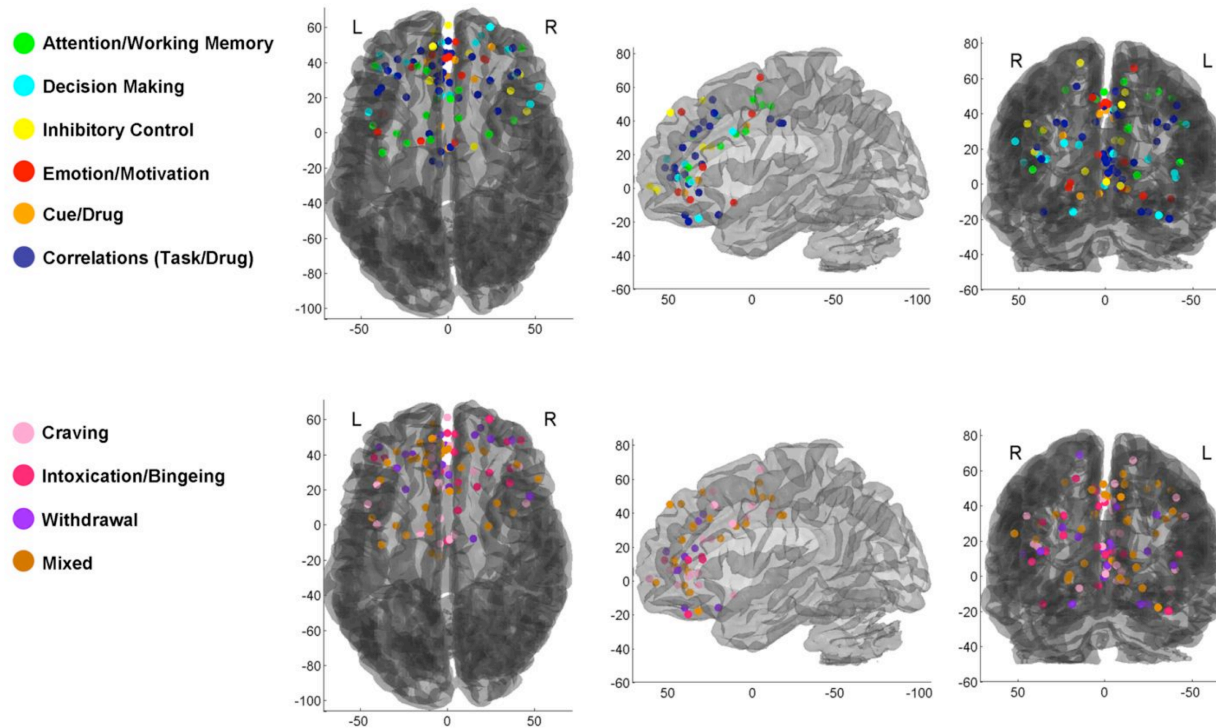

Supplement: NIHMS408806-supplement-Supplemental_8.pdf [file NIHMS408806-supplement-Supplemental_8.pdf]
